# Supplementary material for: Nycterohemeral airborne fungal and bacterial communities and health risks of potential pathogens in Shanghai
Source: Royal Society of Chemistry journal article supplement (doi:10.1039/d3ea00141e), 2023-12-25
Supplement: d3ea00141e1.pdf [file d3ea00141e1.pdf]

*Supplementary of*

**Nycterohemeral airborne fungal and bacterial communities and  
health risks of potential pathogens in Shanghai**

Xueyun Geng<sup>a</sup>, Changliang Nie<sup>a\*</sup>, Hui Chen<sup>a</sup>, Xu Tang<sup>b</sup>, Min Wei<sup>c</sup>, Yi Wang<sup>d</sup>,  
Huanxiang Gao<sup>d</sup>, Dan Li<sup>a</sup>, Mingliang Fang<sup>a</sup>, Ruiting Ju<sup>a</sup>, Bo Li<sup>a</sup>, Haidong Kan<sup>e</sup>, Renjie  
Chen<sup>e</sup>, Jinzhuo Zhao<sup>e</sup>, Lin Wang<sup>a,b</sup>, Jianmin Chen<sup>a,b,f,\*</sup>

<sup>a</sup> *Shanghai Key Laboratory of Atmospheric Particle Pollution and Prevention (LAP<sup>3</sup>),  
Department of Environmental Science & Engineering, National Observations and  
Research Station for Wetland Ecosystems of the Yangtze Estuary, Fudan University,  
Shanghai 200438, China.*

<sup>b</sup> *IRDR International Center of Excellence on Risk Interconnectivity and Governance  
on Weather/Climate Extremes Impact and Public Health, Institute of Atmospheric  
Sciences, Fudan University, Shanghai 200438, China.*

<sup>c</sup> *College of Geography and Environment, Shandong Normal University, Jinan 250014,  
China*

<sup>d</sup> *Thermo Fisher Scientific China, 200050, China.*

<sup>e</sup> *Public Health School, Fudan University, Shanghai 200, China.*

<sup>f</sup> *Institute of Eco-Chongming (IEC), Shanghai 200062, China.*

*\* Corresponding author:*

*E-mail address:* CL Nie ([niechangliang@fudan.edu.cn](mailto:niechangliang@fudan.edu.cn)), JM Chen

([jmchen@fudan.edu.cn](mailto:jmchen@fudan.edu.cn))

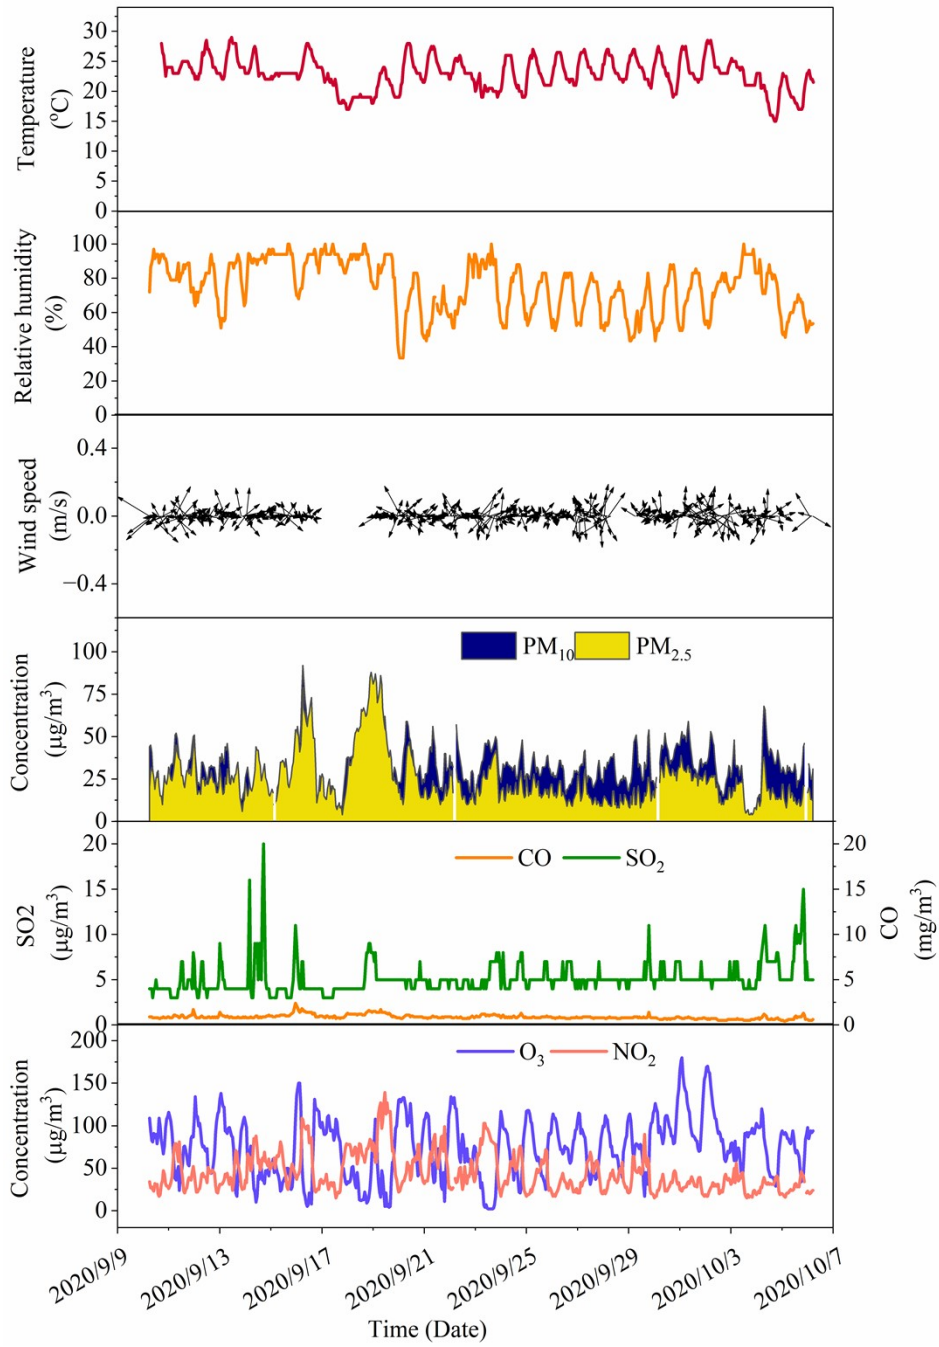

Figure S1. The hourly pollutant (PM<sub>10</sub>, PM<sub>2.5</sub>, O<sub>3</sub>, NO<sub>2</sub>, CO, SO<sub>2</sub>) concentrations in Shanghai during the sampling period.

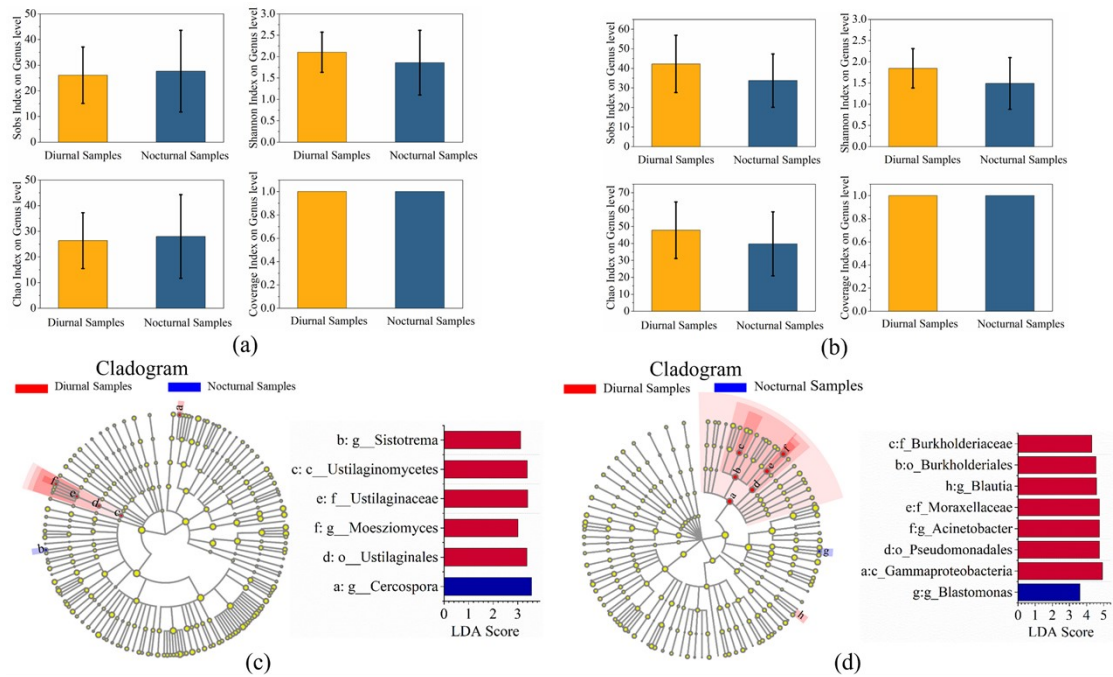

Figure S2. The  $\alpha$ -diversity of airborne (a) fungi and (b) bacteria in diurnal and nocturnal samples. (c) and (d) represents the LefSe analysis corresponding to the fungi and bacteria community. The taxonomic cladogram was visualized with LDA values higher than 3. The red and blue dots represent distinct fungal and bacterial taxon on diurnal and nocturnal days. Each bar represents a fungal taxon, and the absolute value of LDA represents the difference of this taxon in different groups.

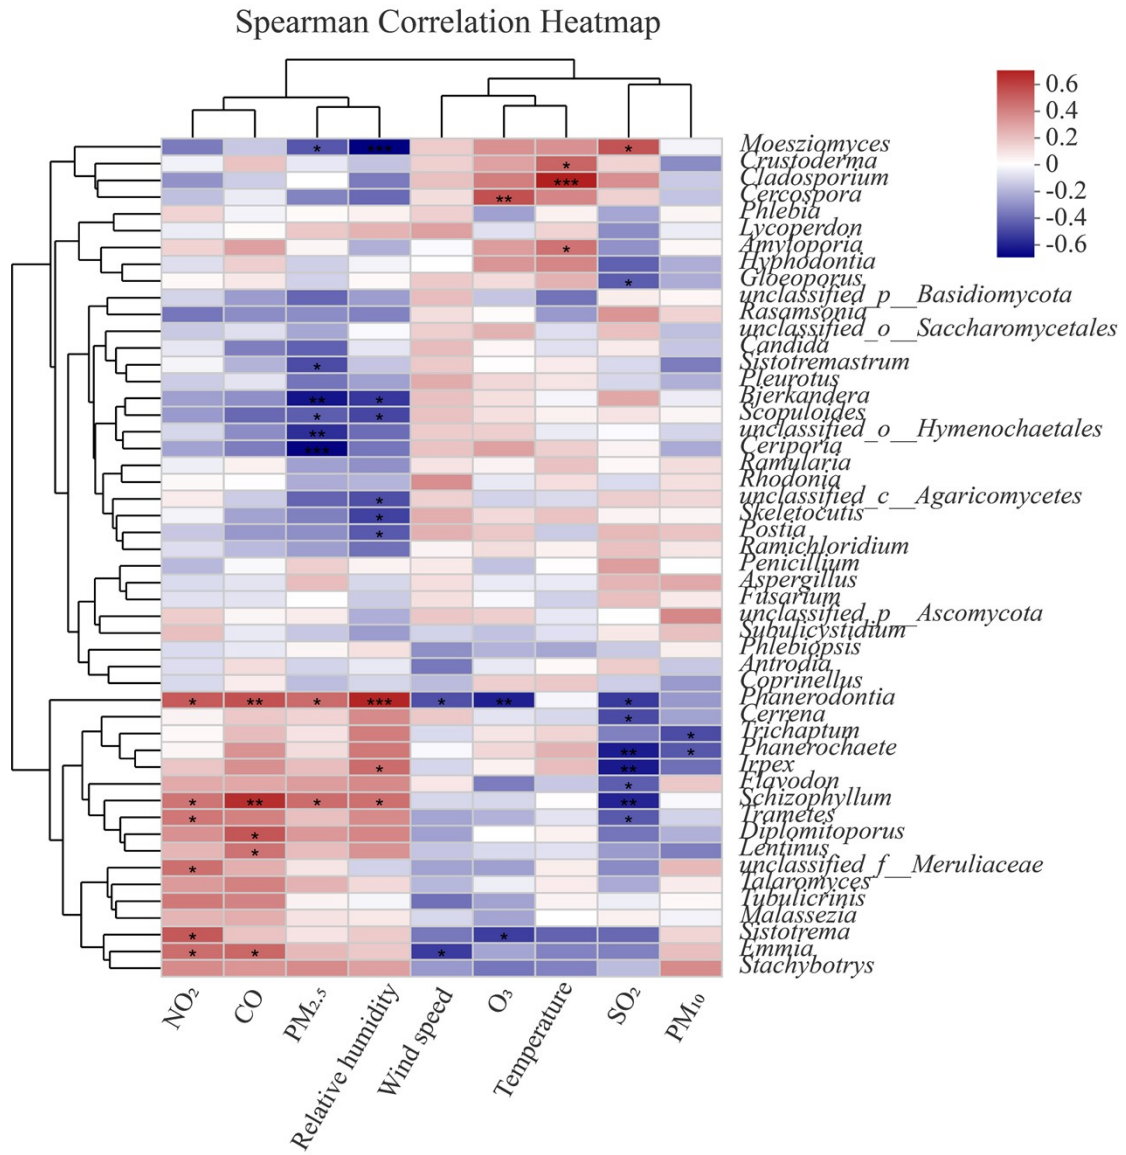

Figure S3. The correlation analysis between the relative abundance of fungi and air quality.

### Spearman Correlation Heatmap

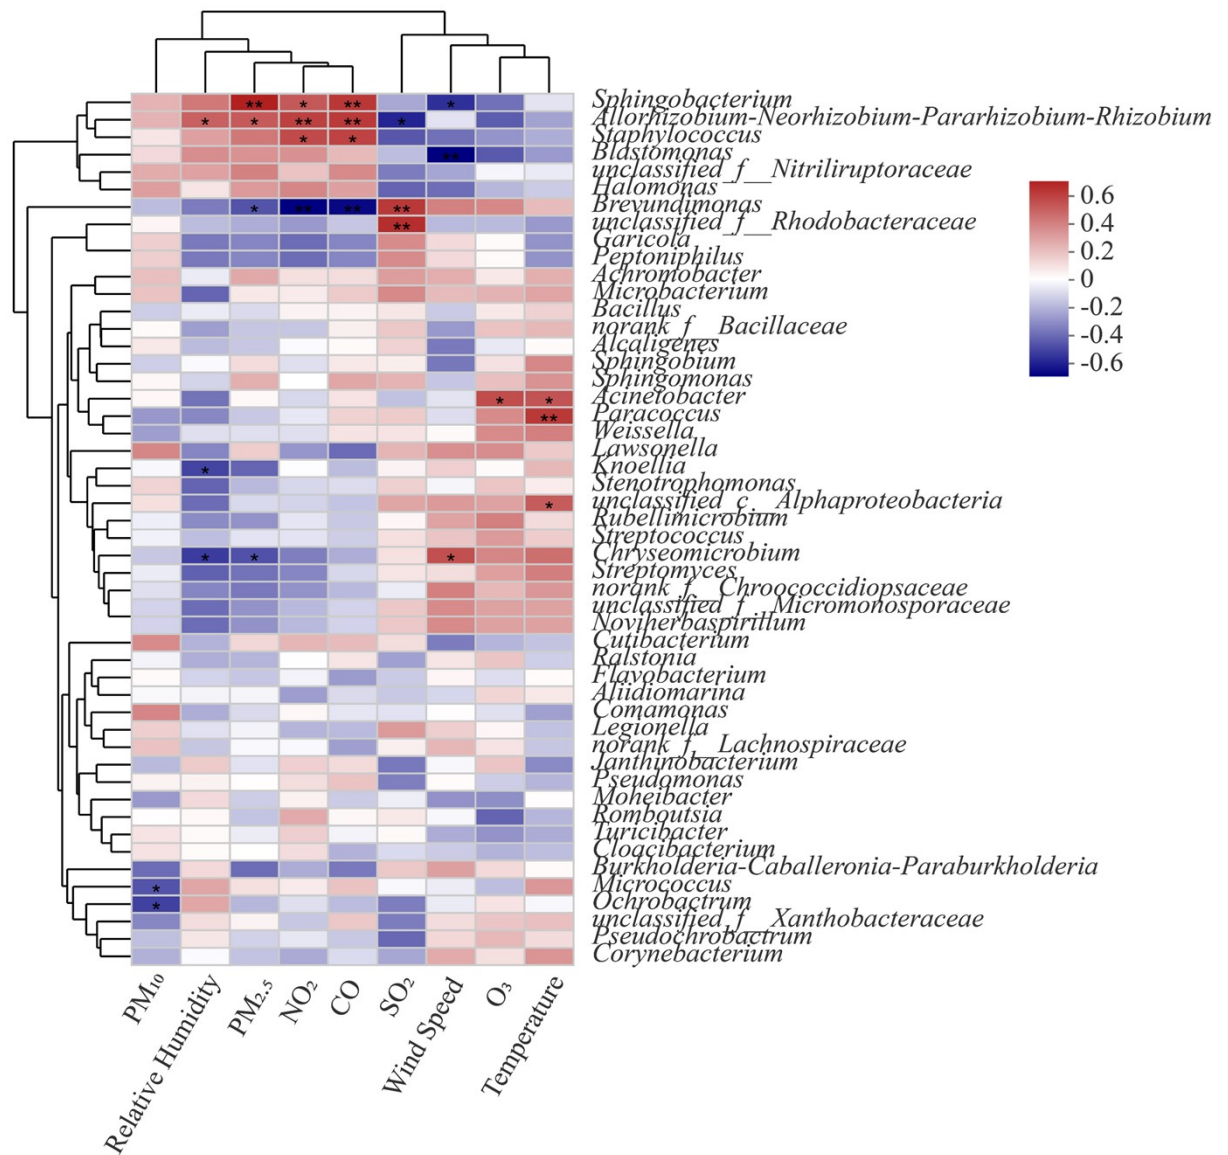

Figure S4. The correlation analysis between the relative abundance of bacteria and air quality.

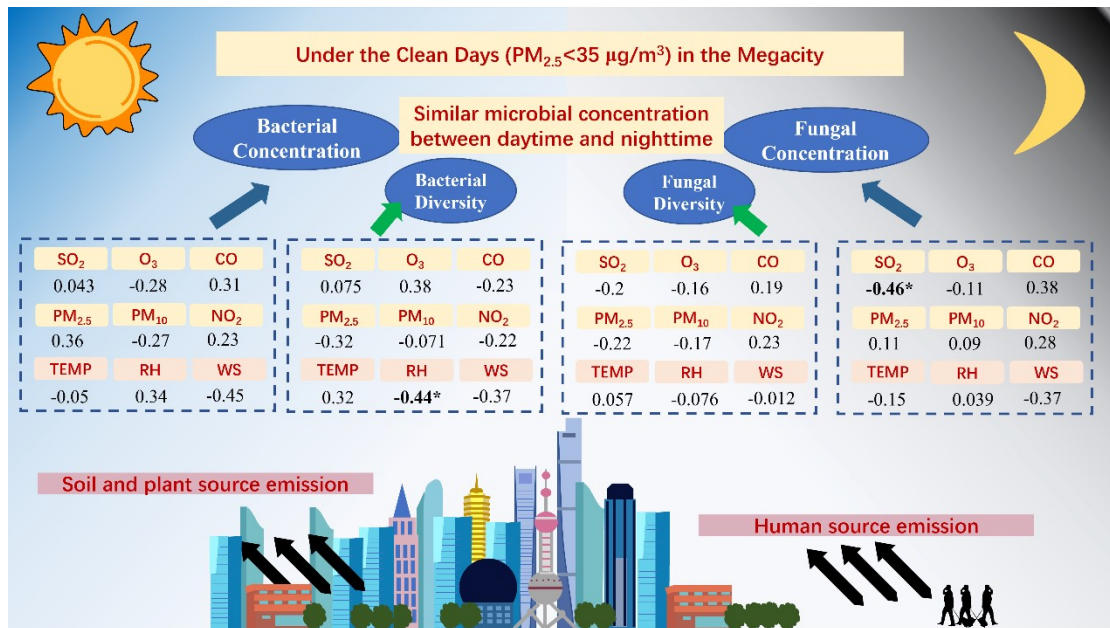

Figure S5. The correlation analysis based on Spearman between the airborne microbiota and environmental index. TEMP means the temperature. RH means the relative humidity. WS means the wind speed.



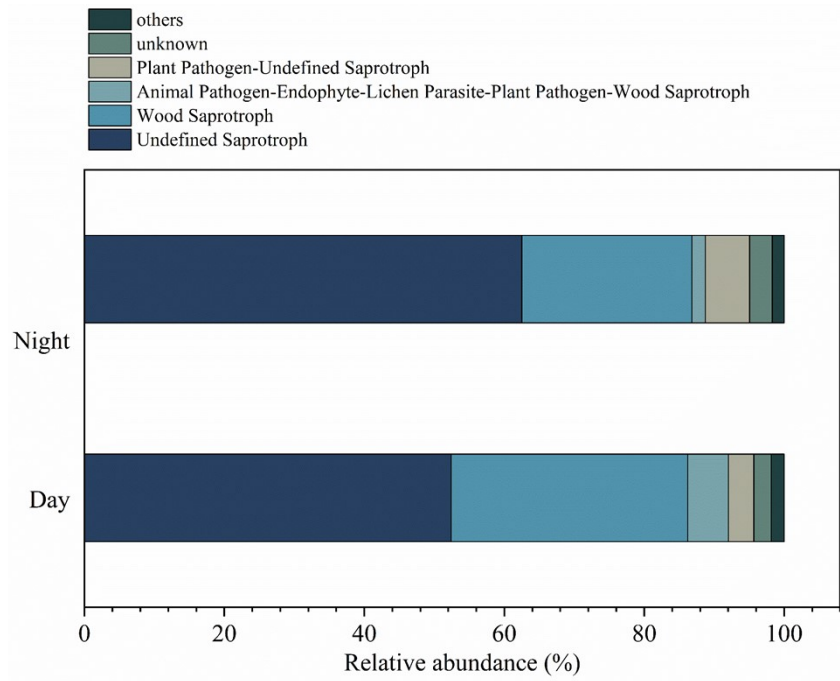

Figure S6. Functional guild airborne fungi in the day and night samples.

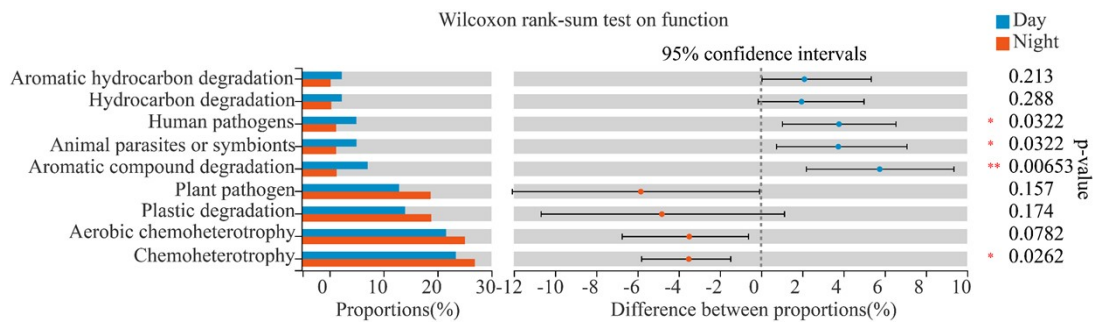

Figure S7. The bacterial function prediction is based on the FAPROTAX.



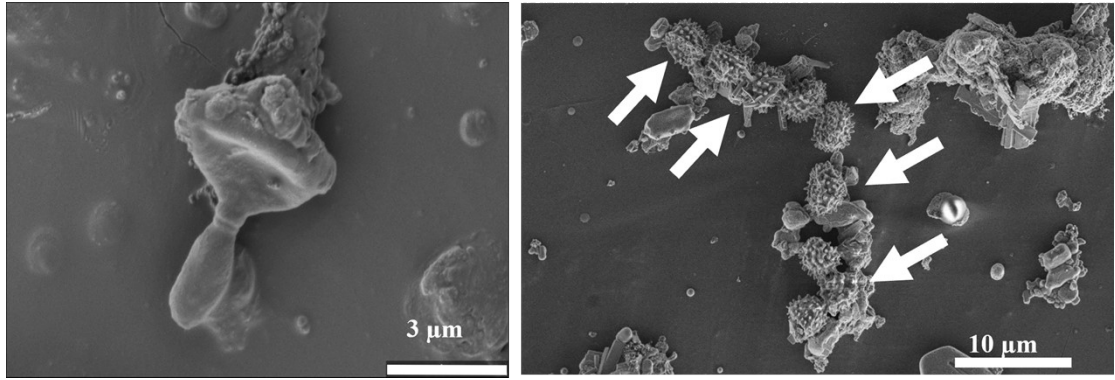

Figure S8. The scanning electron microscopic images of fungal spores.

Table S1 The sample collection details

| Diurnal Samples | Sample date    | Nocturnal Samples | Sample date     |
|-----------------|----------------|-------------------|-----------------|
| D1              | 2020/9/11/6:00 | N1                | 2020/9/10 18:00 |
|                 | 2020/9/12/6:00 |                   | 2020/9/11 18:00 |
| D2              | 2020/9/13 6:00 | N2                | 2020/9/12 18:00 |
|                 | 2020/9/14 6:00 |                   | 2020/9/13 18:00 |
| D3              | 2020/9/15 6:00 | N3                | 2020/9/14 18:00 |
|                 | 2020/9/16 6:00 |                   | 2020/9/15 18:00 |
| D4              | 2020/9/17 6:00 | N4                | 2020/9/16 18:00 |
|                 | 2020/9/18 6:00 |                   | 2020/9/17 18:00 |
| D5              | 2020/9/19 6:00 | N5                | 2020/9/18 18:00 |
|                 | 2020/9/20 6:00 |                   | 2020/9/19 18:00 |
| D6              | 2020/9/21 6:00 | N6                | 2020/9/20 18:00 |
|                 | 2020/9/22 6:00 |                   | 2020/9/21 18:00 |
| D8              | 2020/9/25 6:00 | N7                | 2020/9/22 18:00 |
|                 | 2020/9/26 6:00 |                   | 2020/9/23 18:00 |
| D9              | 2020/9/27 6:00 | N8                | 2020/9/24 18:00 |
|                 | 2020/9/28 6:00 |                   | 2020/9/25 18:00 |
| D10             | 2020/9/29 6:00 | N9                | 2020/9/26 18:00 |
|                 | 2020/9/30 6:00 |                   | 2020/9/27 18:00 |
| D11             | 2020/10/1 6:00 | N10               | 2020/9/28 18:00 |
|                 | 2020/10/2 6:00 |                   | 2020/10/1 18:00 |
| D12             | 2020/10/3 6:00 | N11               | 2020/10/2 18:00 |
|                 | 2020/10/4 6:00 |                   | 2020/10/3 18:00 |
| D13             | 2020/10/5 6:00 | N12               | 2020/10/4 18:00 |
|                 | 2020/10/6 6:00 |                   | 2020/10/5 18:00 |

Table S2. The primers for nested PCR

|          | Target gene | Primer (5'-3')                |
|----------|-------------|-------------------------------|
| Bacteria | 16S rRNA    | 27F:AGAGTTTGATCCTGGCTCAG      |
|          |             | 1492R: TACGGYTACCTTGTTACGACTT |
|          |             | 341F:CCTAYGGGRBGCASCAG        |
|          |             | 806R:GGACTACNNGGGTATCTAAT     |
| Fungi    | ITS region  | ITS1F:CTTGGTCATTTAGAGGAAGTAA  |
|          |             | ITS2R:GCTGCGTTCTTCATCGATGC    |
|          |             | ITS4R:TCCTCCGCTTATTGATATGC    |
